# Supplementary material for: Sociodemographic Factors Associated with COVID-19 Vaccination among People in Guatemalan Municipalities
Source: MDPI journal article supplement (doi:10.3390/vaccines11040745), 2023-03-28
Supplement: s1 [file s1]

**Supplemental Table S1.** Association between sociodemographic factors (by municipalities and departments) and two-dose vaccination coverage (%) by municipalities in Guatemala (N = 336). SARS-CoV-2 case and vaccination data are from February 13, 2020 to October 1, 2021.

| BIVARIATE MODEL                                                      |             |                         |        |                         |                            | FULL MULTIVARIABLE MODEL |                         |       |                         | SIMPLIFIED MULTIVARIABLE MODEL |             |                         |       |                         |                            |
|----------------------------------------------------------------------|-------------|-------------------------|--------|-------------------------|----------------------------|--------------------------|-------------------------|-------|-------------------------|--------------------------------|-------------|-------------------------|-------|-------------------------|----------------------------|
|                                                                      | Coefficient | 95% Confidence Interval |        | Marginal R <sup>2</sup> | Conditional R <sup>2</sup> | Coefficient              | 95% Confidence Interval |       | Marginal R <sup>2</sup> | Conditional R <sup>2</sup>     | Coefficient | 95% Confidence Interval |       | Marginal R <sup>2</sup> | Conditional R <sup>2</sup> |
| Null multi-level model                                               | 43.766      | 39.645                  | 47.949 | 0.000                   | 0.239                      |                          |                         |       |                         |                                |             |                         |       |                         |                            |
| Municipal level variables                                            |             |                         |        |                         |                            |                          |                         |       |                         |                                |             |                         |       |                         |                            |
| % Mayan                                                              | -0.151      | -0.206                  | -0.095 | 0.120                   | 0.342                      | 0.026                    | -0.028                  | 0.081 |                         |                                | -           | -                       | -     |                         |                            |
| % Rural residence                                                    | -0.188      | -0.251                  | -0.127 | 0.111                   | 0.246                      | -0.001                   | -0.067                  | 0.062 |                         |                                | -           | -                       | -     |                         |                            |
| % Educational level primary school or above                          | 1.400       | 1.184                   | 1.616  | 0.400                   | 0.451                      | 1.046                    | 0.714                   | 1.386 |                         |                                | 0.877       | 0.613                   | 1.138 |                         |                            |
| % Female sex                                                         | 2.527       | 1.022                   | 4.026  | 0.036                   | 0.281                      | 1.793                    | 0.398                   | 3.169 |                         |                                | 2.154       | 0.959                   | 3.354 |                         |                            |
| % in 0 – 17 age group                                                | -1.813      | -2.158                  | -1.470 | 0.296                   | 0.388                      | 0.599                    | -0.015                  | 1.218 |                         |                                | -           | -                       | -     |                         |                            |
| % in 60 or older age group                                           | 4.538       | 3.566                   | 5.485  | 0.218                   | 0.412                      | 2.369                    | 1.114                   | 3.678 |                         |                                | 1.628       | 0.656                   | 2.571 |                         |                            |
| % tested for SARS-CoV-2                                              | 0.521       | 0.431                   | 0.613  | 0.314                   | 0.460                      | 0.242                    | 0.112                   | 0.370 | 0.512                   | 0.583                          | 0.253       | 0.154                   | 0.356 | 0.494                   | 0.560                      |
| % died due to COVID-19                                               | 1.171       | 0.939                   | 1.406  | 0.249                   | 0.406                      | 0.188                    | -0.124                  | 0.491 |                         |                                | -           | -                       | -     |                         |                            |
| Departmental level variables                                         |             |                         |        |                         |                            |                          |                         |       |                         |                                |             |                         |       |                         |                            |
| Under-5 childhood mortality rate                                     | -0.087      | -0.461                  | 0.268  | 0.003                   | 0.249                      | 0.188                    | -0.064                  | 0.431 |                         |                                | -           | -                       | -     |                         |                            |
| % reporting difficulty accessing healthcare facility due to distance | -0.822      | -1.121                  | -0.532 | 0.176                   | 0.249                      | -0.043                   | -0.466                  | 0.377 |                         |                                | -           | -                       | -     |                         |                            |
| % 12-23 month olds receiving third                                   | 0.653       | 0.201                   | 1.106  | 0.073                   | 0.244                      | 0.110                    | -0.301                  | 0.522 |                         |                                | -           | -                       | -     |                         |                            |

Pentavalent  
vaccine  
Gini  
coefficient

-0.619

-1.195

-0.084

0.052

0.245

-0.201

-  
0.682

0.270

-

-

-
